# Supplementary material for: Synthesis of BiVO4via oxidant peroxo-method: insights into the photocatalytic performance and degradation mechanism of pollutants
Source: Royal Society of Chemistry journal article supplement (doi:10.1039/c5nj00984g), 2015-01-01
Supplement: c5nj00984g1.pdf [file c5nj00984g1.pdf]

## SUPPLEMENTARY INFORMATION

### **Synthesis of BiVO<sub>4</sub> via oxidant peroxo-method: Insights into the photocatalytic performance and degradation mechanism of pollutants**

Osmando F. Lopes<sup>a,b</sup>, Kele T. G. Carvalho<sup>b</sup>, Gabriel K. Macedo<sup>c</sup>, Vagner R. de Mendonça<sup>d</sup>, Waldir Avansi Jr.<sup>e,\*</sup>, Caue Ribeiro<sup>b</sup>

<sup>1</sup> *Departamento de Química, Universidade Federal de São Carlos - UFSCar, Rod. Washington Luiz, km 235, CEP 13565-905 São Carlos-SP, Brasil.*

<sup>2</sup> *Laboratório Nacional de Nanotecnologia para o Agronegócio (LNNA) - Embrapa Instrumentação, Rua XV de Novembro, 1452, CEP 13560-970 São Carlos-SP, Brasil.*

<sup>3</sup> *Instituto de Química de São Carlos, Universidade de São Paulo – USP, Av. Trabalhador São Carlense, 400, CEP 13560-970 São Carlos-SP, Brasil*

<sup>4</sup> *Instituto Federal de São Paulo, IFSP – Itapetininga-SP, Brasil*

<sup>5</sup> *Departamento de Física, Universidade Federal de São Carlos, Rod. Washington Luiz, km 235, CEP 13565-905 São Carlos-SP, Brasil.*

---

\*Corresponding author's email address: (W. Avansi Jr.) [w\\_avansi@yahoo.com.br](mailto:w_avansi@yahoo.com.br)  
(O. F. Lopes) [osmando\\_iq@hotmail.com](mailto:osmando_iq@hotmail.com)

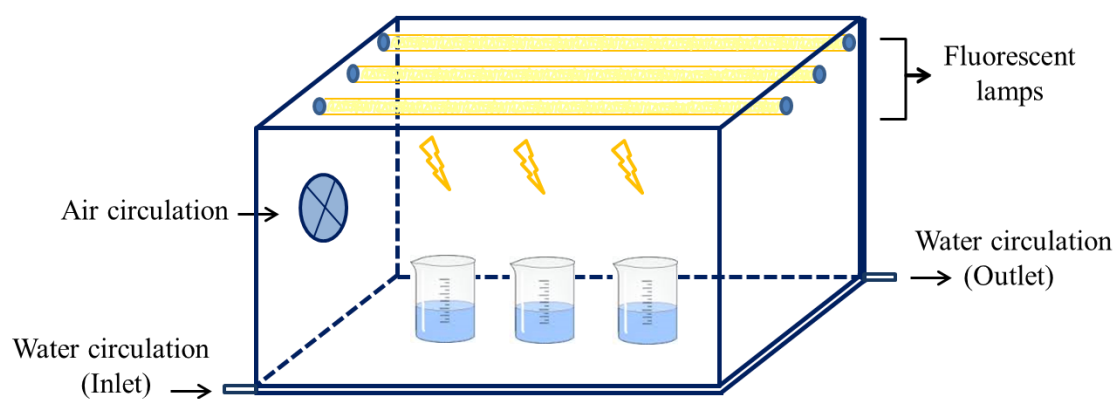

**Fig S1.** Schematic diagram of homemade photo-reactor used in photocatalytic experiments.

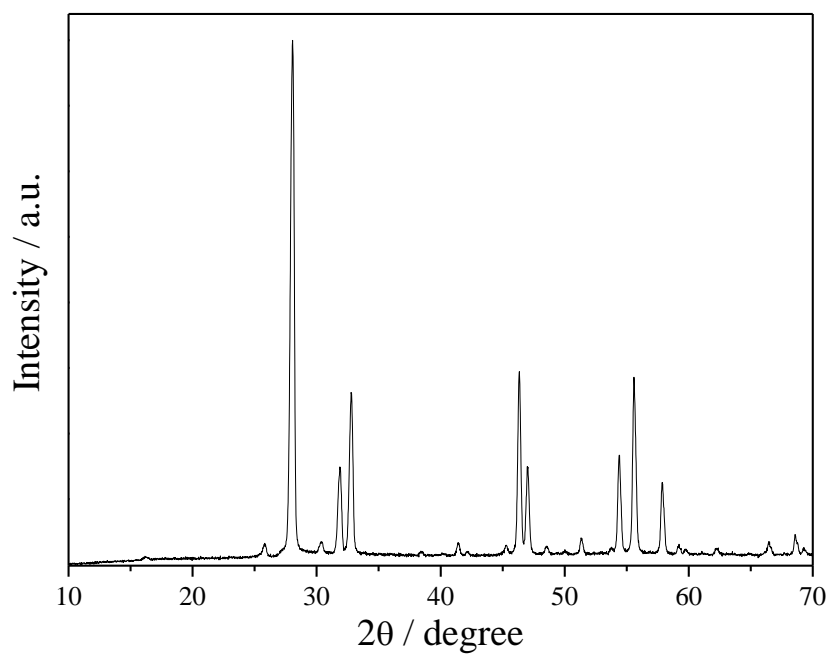

**Fig. S2.** Typical XRD pattern of tetragonal  $\text{Bi}_2\text{O}_3$  commercial nanopowder.

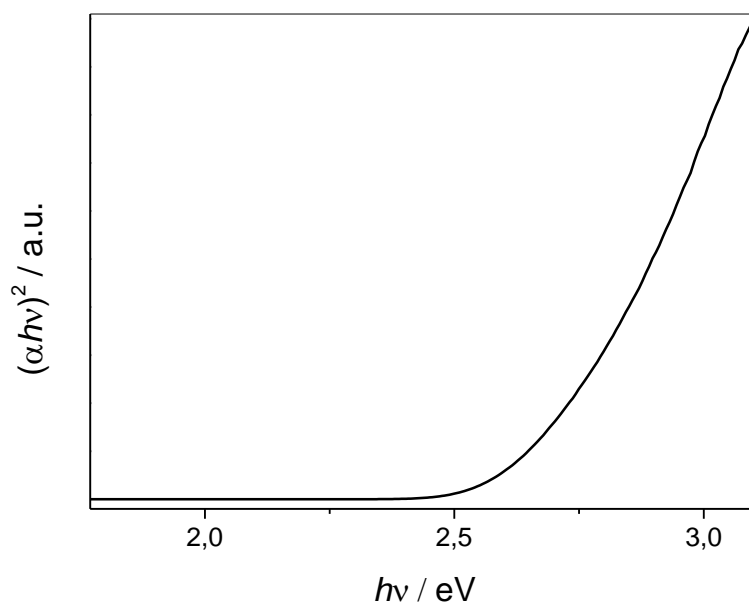

**Fig. S3.** Plots of  $(\alpha h\nu)^2$  vs. photon energy ( $h\nu$ ) obtained by Tauc equation from DRS spectra to tetragonal  $\text{Bi}_2\text{O}_3$  commercial.

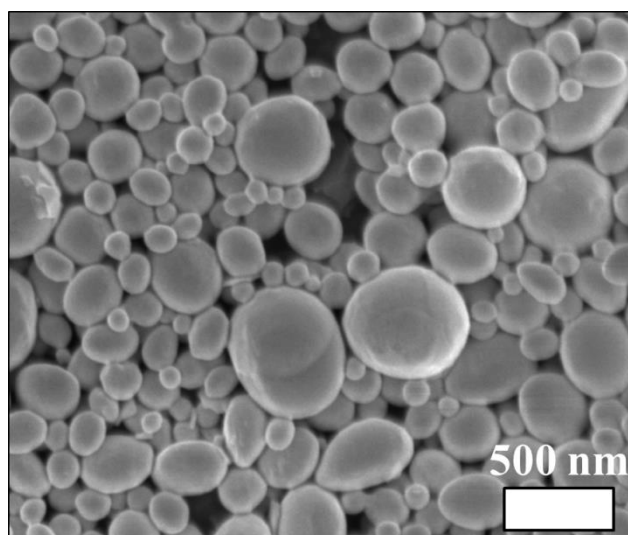

**Fig. S4.** SEM images of tetragonal  $\text{Bi}_2\text{O}_3$  commercial nanopowder.

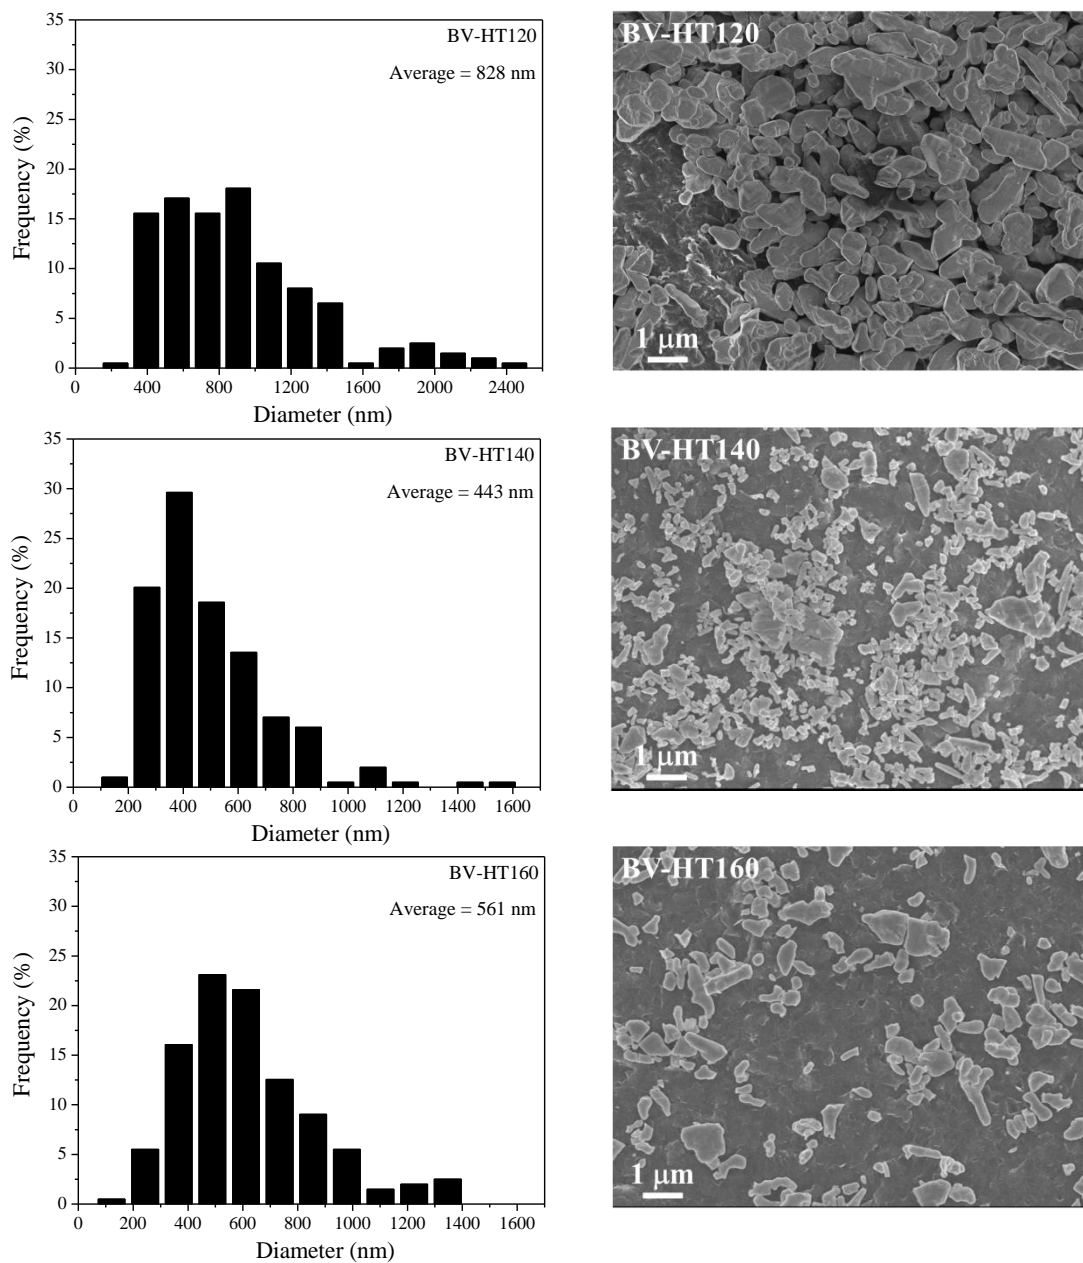

**Fig. S5.** The size distribution of the particles and their respectively SEM images of as-synthesized samples of  $\text{BiVO}_4$ .
